# Supplementary material for: Mortality and the risk of cause-specific death in patients with depression: A nationwide cohort study
Source: Research Square preprint supplement (doi:10.21203/rs.3.rs-8433731/v1), 2026-02-16

**Supplementary Table 1. Hazard ratios and 95% confidence intervals of depression on each cause of death according to sex subgroups**

|  | **Sex subgroup** | | |
| --- | --- | --- | --- |
| **Male** | **Female** | **P for**  **interaction** |
| All-cause death | 1.10 (1.08, 1.12) | 1.08 (1.06, 1.11) | 0.304 |
| Infectious diseases | 1.21 (1.08, 1.36) | 1.19 (1.06, 1.32) | 0.805 |
| Cancers | 0.93 (0.89, 0.96) | 0.83 (0.80, 0.87) | <0.001 |
| Endocrine diseases | 1.23 (1.11, 1.36) | 1.19 (1.07, 1.31) | 0.598 |
| Mental disorders | 1.21 (1.01, 1.45) | 1.31 (1.10, 1.56) | 0.539 |
| Neurological disorders | 1.51 (1.37, 1.66) | 1.26 (1.16, 1.37) | 0.005 |
| Cardiovascular diseases | 1.08 (1.03, 1.14) | 1.03 (0.99, 1.08) | 0.141 |
| Respiratory diseases | 1.18 (1.11, 1.24) | 1.15 (1.08, 1.22) | 0.564 |
| Digestive diseases | 0.98 (0.89, 1.08) | 1.18 (1.06, 1.32) | 0.009 |
| Genitourinary diseases | 1.08 (0.94, 1.22) | 1.01 (0.90, 1.14) | 0.481 |
| Suicide | 1.90 (1.76, 2.06) | 2.31 (2.10, 2.54) | 0.001 |
| Others | 1.16 (1.11, 1.22) | 1.24 (1.18, 1.30) | 0.062 |

Adjusted for age, low income, smoking, drinking, physical activity, obesity, anxiety disorder, insomnia, substance use disorder, obsessive-compulsive disorder, posttraumatic stress disorder, dementia, diabetes, hypertension, dyslipidemia, cancer, and the Charlson comorbidity index

**Supplementary Table 2. Hazard ratios and 95% confidence intervals of depression on each cause of death according to age subgroups**

|  | **Age subgroup** | | | |
| --- | --- | --- | --- | --- |
| **20–39 years** | **40–64 years** | **≥65 years** | **P for**  **interaction** |
| All-cause death | 1.97 (1.70, 2.29) | 1.27 (1.23, 1.30) | 1.04 (1.02, 1.05) | <0.001 |
| Infectious diseases |  | 1.52 (1.27, 1.82) | 1.14 (1.04, 1.25) | 0.014 |
| Cancers | 1.06 (0.70, 1.61) | 0.92 (0.88, 0.97) | 0.87 (0.84, 0.90) | 0.112 |
| Endocrine diseases | 4.15 (1.51, 11.45) | 1.69 (1.47,1.941) | 1.09 (1.00, 1.19) | <0.001 |
| Mental disorders | 4.17 (0.99, 17.63) | 1.81 (1.40, 2.34) | 1.16 (1.00, 1.34) | 0.002 |
| Neurological disorders | 3.44 (1.08, 10.97) | 2.28 (1.96, 2.65) | 1.24 (1.15, 1.33) | <0.001 |
| Cardiovascular diseases | 1.00 (0.57, 1.77) | 1.24 (1.15, 1.33) | 1.02 (0.98, 1.06) | <0.001 |
| Respiratory diseases | 1.20 (0.17, 8.67) | 1.85 (1.66, 2.07) | 1.10 (1.05, 1.15) | <0.001 |
| Digestive diseases | 2.12 (1.05, 4.30) | 1.23 (1.10, 1.38) | 0.96 (0.88, 1.06) | <0.001 |
| Genitourinary diseases | 2.19 (0.30, 16.10) | 1.75 (1.45, 2.11) | 0.94 (0.85, 1.03) | <0.001 |
| Suicide | 2.54 (2.03, 3.18) | 2.16 (1.99, 2.36) | 1.86 (1.69, 2.04) | 0.007 |
| Other diseases | 2.14 (1.58, 2.89) | 1.38 (1.29, 1.47) | 1.14 (1.10, 1.19) | <0.001 |

Adjusted for sex, low income, smoking, drinking, physical activity, obesity, anxiety disorder, insomnia, substance use disorder, obsessive-compulsive disorder, posttraumatic stress disorder, dementia, diabetes, hypertension, dyslipidemia, cancer, and the Charlson comorbidity index

**Supplementary Table 3. Hazard ratios and 95% confidence intervals of depression on each cause of death according to the Charlson comorbidity index subgroups**

|  | **CCI subgroup** | | | | |
| --- | --- | --- | --- | --- | --- |
| **0** | **1** | **2** | **≥3** | **P for**  **interaction** |
| All-cause death | 1.24 (1.18, 1.30) | 1.20 (1.16, 1.25) | 1.17 (1.14, 1.21) | 1.03 (1.01, 1.05) | <0.001 |
| Infectious diseases | 1.26 (0.91, 1.74) | 1.39 (1.13, 1.70) | 1.18 (0.98, 1.42) | 1.16 (1.05, 1.28) | 0.440 |
| Cancers | 1.05 (0.96, 1.15) | 1.00 (0.93, 1.08) | 0.96 (0.90, 1.03) | 0.83 (0.80, 0.86) | <0.001 |
| Endocrine diseases | 0.64 (0.33, 1.24) | 1.39 (1.07, 1.82) | 1.33 (1.09, 1.61) | 1.19 (1.10, 1.29) | 0.126 |
| Mental disorders | 1.44 (0.97, 2.14) | 1.23 (0.91, 1.65) | 1.59 (1.23, 2.06) | 1.13 (0.95, 1.35) | 0.149 |
| Neurological disorders | 1.89 (1.54, 2.33) | 1.39 (1.19, 1.63) | 1.52 (1.32, 1.75) | 1.24 (1.13, 1.35) | <0.001 |
| Cardiovascular diseases | 1.05 (0.93, 1.18) | 1.02 (0.94, 1.11) | 1.04 (0.97, 1.12) | 1.07 (1.03, 1.12) | 0.762 |
| Respiratory diseases | 1.33 (1.13, 1.56) | 1.14 (1.03, 1.27) | 1.17 (1.06, 1.28) | 1.15 (1.09, 1.21) | 0.409 |
| Digestive diseases | 1.54 (1.21, 1.97) | 1.26 (1.04, 1.53) | 1.15 (0.97, 1.36) | 0.97 (0.88, 1.06) | <0.001 |
| Genitourinary diseases | 1.56 (1.08, 2.26) | 1.31 (1.00, 1.70) | 1.09 (0.87, 1.38) | 0.98 (0.88, 1.08) | 0.026 |
| Suicide | 2.38 (2.08, 2.73) | 2.56 (2.26, 2.89) | 2.00 (1.75, 2.29) | 1.74 (1.58, 1.91) | <0.001 |
| Other diseases | 1.19 (1.06, 1.32) | 1.23 (1.13, 1.33) | 1.28 (1.19, 1.38) | 1.16 (1.11, 1.22) | 0.148 |

Adjusted for age, sex, low income, smoking, drinking, physical activity, obesity, anxiety disorder, insomnia, substance use disorder, obsessive-compulsive disorder, posttraumatic stress disorder, dementia, diabetes, hypertension, dyslipidemia, and cancer

**Supplementary Figure 1. Flowchart showing the identification of participants**


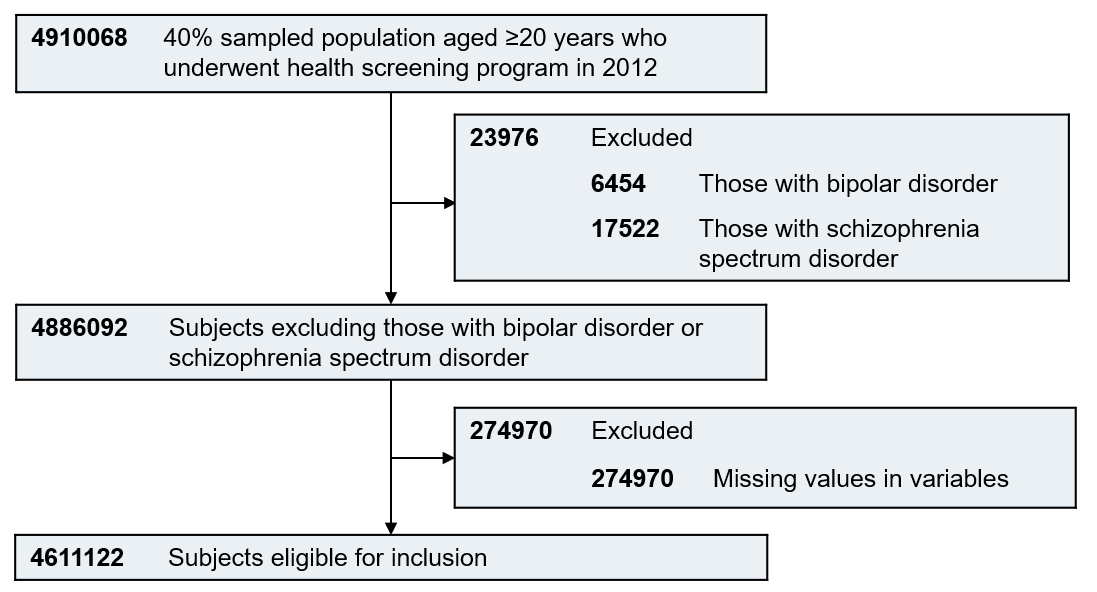

Supplement: Supplementary file 1 [file 0df2d493fc9cd5dd847a8b4a.docx]
